# Supplementary material
Source: HighWire-hosted journal article supplement (https://heart.bmj.com/content/109/17/1319)
Supplement: inline-supplementary-material-1 [file inline-supplementary-material-1.pdf]

## SUPPLEMENTARY MATERIAL

**Supplementary Table 1. Survival Profile and Adjusted Risk for Mortality According to Estimated Right Ventricular Systolic Pressure Levels excluding patients with just AVA<1.5cm<sup>2</sup> (n = 12770).**

|                                                      | <b>Normal eRVSP<br/>(&lt;30mmHg)<br/>n = 1478</b> | <b>Borderline<br/>PHT (eRVSP<br/>30.00-39.99)<br/>N = 4214</b> | <b>Mild PHT<br/>(eRVSP<br/>40.00-49.99)<br/>N = 3964</b> | <b>Moderate PHT<br/>(eRSVP 50.00 -<br/>59.99)<br/>N = 1781</b> | <b>Severe PHT<br/>(eRVSP &gt;60)<br/>N = 1333</b> |
|------------------------------------------------------|---------------------------------------------------|----------------------------------------------------------------|----------------------------------------------------------|----------------------------------------------------------------|---------------------------------------------------|
| <b>All-Cause Mortality<br/>N (%)<br/>HR (95% CI)</b> | 467 (31.6)<br>Reference                           | 1898 (45.0)<br>HR 1.09 (1.02 -<br>1.20)                        | 2200 (55.5)<br>HR 1.28<br>(1.16-1.42)                    | 1168 (65.6)<br>HR 1.81 (1.62–<br>2.01)                         | 1054 (79.1)<br>HR 2.81 (2.52–<br>3.14)            |
| <b>Cardiovascular<br/>mortality</b>                  | 168 (11.4)<br>Reference                           | 728 (17.3)<br>HR 0.83 (0.70-<br>0.98)                          | 888 (22.4)<br>HR 0.94<br>(0.80-1.11)                     | 493 (27.7)<br>HR 1.30 (1.09-<br>1.55)                          | 535 (40.1)<br>HR 2.21 (1.86–<br>2.64)             |

Cox Regression Analyses for total cohort (n = 12770) adjusted for age and sex. Values are n (%) or n/M (%), unless otherwise indicated. CI = confidence interval; eRVSP = estimated right ventricular systolic pressure; HR = hazard ratio; PHT = pulmonary hypertension.

**Supplementary Table 2. Survival Profile and Adjusted Risk for Mortality According to Estimated Right Ventricular Systolic Pressure Levels in patients with moderate aortic stenosis (n = 10 085)**

|                                                      | <b>Normal eRVSP<br/>(&lt;30mmHg)<br/>n = 1526</b> | <b>Borderline<br/>PHT (eRVSP<br/>30.00-39.99)<br/>N = 3540</b> | <b>Mild PHT<br/>(eRVSP<br/>40.00-49.99)<br/>N = 2962</b> | <b>Moderate PHT<br/>(eRSVP 50.00 -<br/>59.99)<br/>N = 1195</b> | <b>Severe PHT<br/>(eRVSP &gt;60)<br/>N = 862</b> |
|------------------------------------------------------|---------------------------------------------------|----------------------------------------------------------------|----------------------------------------------------------|----------------------------------------------------------------|--------------------------------------------------|
| <b>All-Cause Mortality<br/>N (%)<br/>HR (95% CI)</b> | 363 (23.8)<br>Reference                           | 1311 (37.0)<br>HR 1.13 (1.01-<br>1.27)                         | 1484 (50.1)<br>HR 1.45<br>(1.29-1.63)                    | 741 (62.0)<br>HR 2.00 (1.76–<br>2.27)                          | 625 (72.5)<br>HR 3.28 (2.87-<br>3.73)            |
| <b>Cardiovascular<br/>mortality</b>                  | 110 (7.2)<br>Reference                            | 439 (12.4)<br>HR 0.82 (0.66-<br>1.01)                          | 508 (17.2)<br>HR 0.91<br>(0.74-1.12)                     | 282 (23.6)<br>HR 1.29 (1.03-<br>1.61)                          | 263 (30.5)<br>HR 2.01 (1.61–<br>2.52)            |

Cox Regression Analyses for moderate aortic stenosis adjusted for age and sex. Values are n (%) or n/M (%), unless otherwise indicated. CI = confidence interval; eRVSP = estimated right ventricular systolic pressure; HR = hazard ratio; PHT = pulmonary hypertension.

**Supplementary Table 3. Survival Profile and Adjusted Risk for Mortality According to Estimated Right Ventricular Systolic Pressure Levels in patients with severe aortic stenosis (n = 4895)**

|                                                      | <b>Normal eRVSP<br/>(&lt;30mmHg)<br/>n = 523</b> | <b>Borderline<br/>PHT (eRVSP<br/>30.00-39.99)<br/>N = 1545</b> | <b>Mild PHT<br/>(eRVSP<br/>40.00-49.99)<br/>N = 1418</b> | <b>Moderate PHT<br/>(eRVSP 50.00 -<br/>59.99)<br/>N = 761</b> | <b>Severe PHT<br/>(eRVSP &gt;60)<br/>N = 648</b> |
|------------------------------------------------------|--------------------------------------------------|----------------------------------------------------------------|----------------------------------------------------------|---------------------------------------------------------------|--------------------------------------------------|
| <b>All-Cause Mortality<br/>N (%)<br/>HR (95% CI)</b> | 181 (34.6)<br>Reference                          | 790 (51.1)<br>HR 1.15 (0.98 -<br>1.35)                         | 887 (62.6)<br>HR 1.32<br>(1.13-1.55)                     | 541 (71.1)<br>HR 1.88 (1.59-<br>2.23)                         | 523 (80.7)<br>HR 2.51 (2.12-<br>2.98)            |
| <b>Cardiovascular<br/>mortality</b>                  | 76 (14.5)<br>Reference                           | 318 (20.6)<br>HR 0.87 (0.67-<br>1.11)                          | 407 (28.7)<br>HR 0.98<br>(0.76-1.25)                     | 256 (33.6)<br>HR 1.37 (1.06-<br>1.77)                         | 279 (43.0)<br>HR 2.02 (1.56-<br>2.61)            |

Cox Regression Analyses for severe aortic stenosis adjusted for age and sex. Values are n (%) or n/M (%), unless otherwise indicated. CI = confidence interval; eRVSP = estimated right ventricular systolic pressure; HR = hazard ratio; PHT = pulmonary hypertension.

**Supplementary Table 4. Survival Profile and Adjusted Risk for Mortality According to decile distribution of Estimated Right Ventricular Systolic Pressure Levels (n = 14980)**

| <b>eRVSP decile distribution (mmHg)</b> | <b>All Fatal Events<br/>(n= 14980)<br/>HR (95% CI), p value</b> |
|-----------------------------------------|-----------------------------------------------------------------|
| 0.00 – 28.00                            | Reference                                                       |
| 28.01 – 32.00                           | 1.03 (0.90-1.18)                                                |
| 32.01 – 35.00                           | 1.00 (0.88-1.14)                                                |
| 35.01 – 38.00                           | 1.19 (1.04-1.35)                                                |
| 38.01 – 40.69                           | 1.20 (1.06-1.36)                                                |
| 40.70 – 43.64                           | 1.28 (1.14-1.45)                                                |
| 43.65 – 46.48                           | 1.37 (1.21-1.55)                                                |
| 46.49 – 50.96                           | 1.53 (1.34-1.73)                                                |
| 50.97 – 60.00                           | 2.07 (1.84-2.33)                                                |
| 60.01 – 136.97                          | 2.86 (2.54-3.21)                                                |

Analyses adjusted for age, sex and mean aortic valve gradient. eRVSP = estimated right ventricular systolic pressure; HR = hazard ratio; CI = confidence interval.

### Supplementary Figures.

### Supplementary Figure 1. One and Five Year Actuarial Mortality excluding patients solely included based on AVA <math>1.5\text{cm}^2</math>

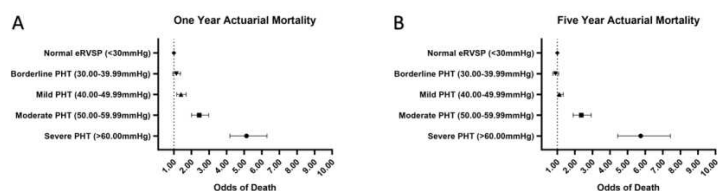

Legend: Actuarial all-cause mortality using logistic regression, adjusted for age and sex, excluding patients solely based on AVA <math>1.5\text{cm}^2</math> showing increased odds of death as pulmonary pressures increase. PHT = pulmonary hypertension. eRVSP = estimated right ventricular systolic pressure.

### Supplementary Figure 2. One and Five Year Actuarial Mortality, excluding patients with $\geq$ moderate mitral regurgitation and/or $\geq$ moderate aortic regurgitation

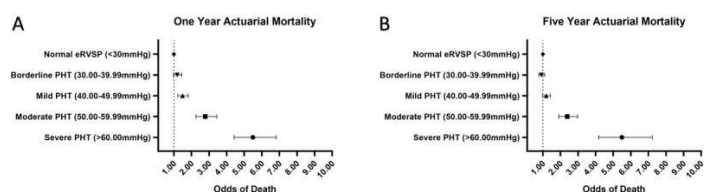

Legend: Actuarial all-cause mortality using logistic regression, adjusted for age, sex and mean aortic valve gradient, for patients without  $\geq$  moderate mitral regurgitation and/or  $\geq$  moderate aortic regurgitation showing increased odds of death as pulmonary pressures increase. PHT = pulmonary hypertension. eRVSP = estimated right ventricular systolic pressure.

### Supplementary Figure 3. One and Five Year Actuarial Mortality for Moderate Aortic Stenosis Cohort

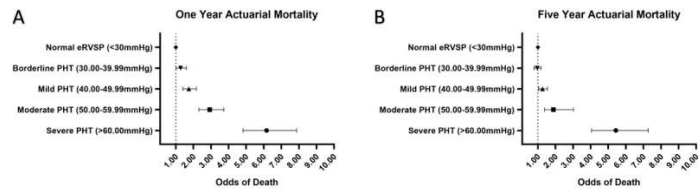

Legend: Actuarial all-cause mortality using logistic regression, adjusted for age and sex, for patients with moderate aortic stenosis showing increased odds of death as pulmonary pressures increase. PHT = pulmonary hypertension. eRVSP = estimated right ventricular systolic pressure.

#### Supplementary Figure 4. One and Five Year Actuarial Mortality for Severe Aortic Stenosis Cohort

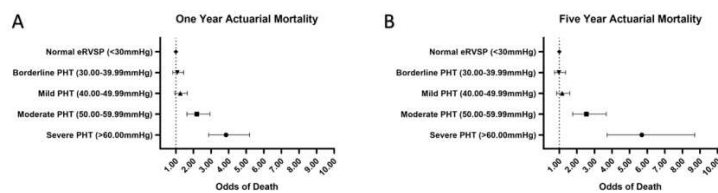

Legend: Actuarial all-cause mortality using logistic regression, adjusted for age and sex, for patients with severe aortic stenosis showing increased odds of death as pulmonary pressures increase. PHT = pulmonary hypertension. eRVSP = right ventricular systolic pressure.
